# Supplementary material for: Co-treatment with Vactosertib, a Novel, Orally Bioavailable Activin Receptor-like Kinase 5 Inhibitor, Suppresses Radiotherapy-induced Epithelial-to-mesenchymal Transition, Cancer Cell Stemness, and Lung Metastasis of Breast Cancer
Source: PubMed Central journal article supplement — Radiol Oncol. 2022 Apr 7;56(2):185–97. doi: 10.2478/raon-2022-0012 (PMC9122287; doi:10.2478/raon-2022-0012), 2022-04-07
Supplement: raon-56-185_SM.pdf [file raon-56-185_SM.pdf]

# Co-treatment with vactosertib, a novel, orally bioavailable activin receptor-like kinase 5 inhibitor, suppresses radiotherapy-induced epithelial-to-mesenchymal transition, cancer cell stemness, and lung metastasis of breast cancer

Jiwon Choi, Jiyoung Park, Ilyoung Cho, Yhunyhong Sheen

doi: 10.2478/raon-2022-0012

## Supplementary Tables

### A.1. Antibodies for western blot analysis

#### A.1.1. Primary antibodies

| Target      | Company                                       | Product number |
|-------------|-----------------------------------------------|----------------|
| p-SMAD2/3   | Santa Cruz Biotechnology, Santa Cruz, CA, USA | sc-11769       |
| SMAD2/3     | BD Biosciences, San Diego, CA, USA            | 610842         |
| SNAIL       | Cell Signaling, Beverly, MA, USA              | 3879           |
| SLUG        | Cell Signaling, Beverly, MA, USA              | 9585           |
| TWIST       | Santa Cruz Biotechnology, Santa Cruz, CA, USA | sc-15393       |
| VIMENTIN    | Santa Cruz Biotechnology, Santa Cruz, CA, USA | sc-32322       |
| FIBRONECTIN | BD Biosciences, San Diego, CA, USA            | 610077         |
| E-CADHERIN  | BD Biosciences, San Diego, CA, USA            | 610182         |
| N-CADHERIN  | BD Biosciences, San Diego, CA, USA            | 610920         |
| NOX4        | Santa Cruz Biotechnology, Santa Cruz, CA, USA | sc-30141       |
| 4HNE        | Santa Cruz Biotechnology, Santa Cruz, CA, USA | ab46545        |
| NANOG       | Abcam, Cambridge, MA, USA                     | ab109250       |
| OCT4        | Abcam, Cambridge, MA, USA                     | ab109183       |
| SOX2        | Abcam, Cambridge, MA, USA                     | ab92494        |
| C-MYC       | Santa Cruz Biotechnology, Santa Cruz, CA, USA | ab32072        |
| KLF4        | Abcam, Cambridge, MA, USA                     | ab151733       |
| SCA1        | Abcam, Cambridge, MA, USA                     | ab109211       |
| GAPDH       | Sigma Aldrich, St. Louis, MO, USA             | MAB374         |
| β-ACTIN     | Sigma Aldrich, St. Louis, MO, USA             | A5316          |

#### A.1.2 Secondary antibodies

| Antibody        | Company                 | Product number |
|-----------------|-------------------------|----------------|
| Anti-rabbit HRP | GenDEPOT, Katy, TX, USA | SA002-500      |
| Anti-mouse HRP  | GenDEPOT, Katy, TX, USA | SA001-500      |

## A.2. Primers for qRT-PCR

| Gene        | Forward (5' - 3')          | Reverse (5' - 3')           |
|-------------|----------------------------|-----------------------------|
| Vimentin    | ACCCGCACCAACGAGAAGGT       | ATTCTGCTGCTCCAGGAAGCG       |
| Fibronectin | GCTCAAGCTGGGTGTACGA        | AAGTTGGTTGGGGGAGACAG        |
| Snail       | GACGCTGAAGTATCCGATAGAACACG | CCGGACATGGCCCTGTAGCA        |
| N-cadherin  | GTGCCATTAGCCAAGGGAAT       | GCGTTCCTGTTCCACTCATA        |
| Nox4        | TCTGTTGTTGGACCCAATCA       | AGCTGATTGATTCCGCTGAG        |
| Nanog       | TGGGATTACAGGCGTGAGC        | AAGCAAAGCCTCCCAATCCC        |
| Oct4        | GGGCTCTCCCATGCATTCAA       | CACCTTCCCTCCAACCAGIT        |
| Sox2        | TCGGCAGACTGATTCAAATAATACAG | CCATGCAGGTTGACACCGTIG       |
| c-Myc       | GCGTCCTGGGAAGGGAGATCCGGAGC | TTGAGGGGCATCGTCGGGGAGGCTG   |
| Klf4        | ACGATCGTGGCCCCGGAAAA       | CAACAACCGAAAAATGCACCAGCCCCA |
| Ppia        | TGCACAGACGGTCACTCAAA       | TGCCATCGCCAAGGAGTAG         |

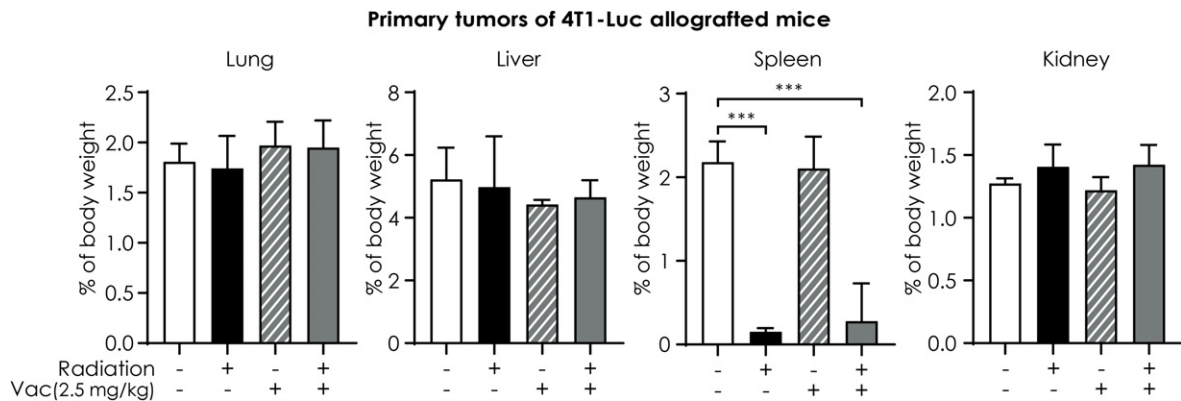

**SUPPLEMENTARY FIGURE A.** Changes in organ weight by radiation and vactisertib. Organ weights in each group were calculated as relative organ weights to the weight of the mice. The spleen weight was significantly decreased in the radiotherapy group and in the radiotherapy and vactosertib group, but there was little change in weight in other organs.

## ① 4T1-Luc

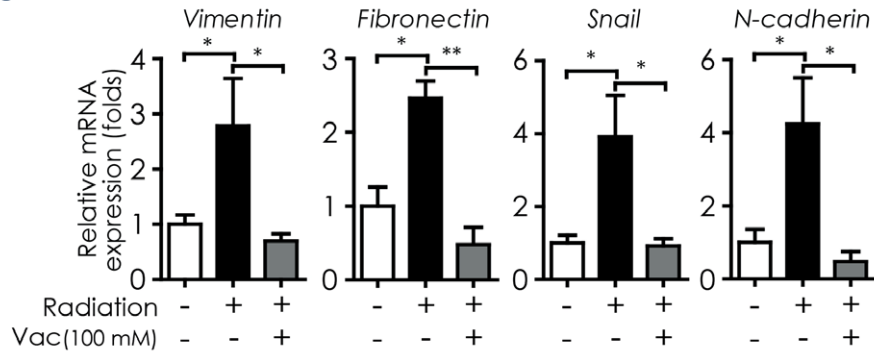

## ② MDA-MB-231

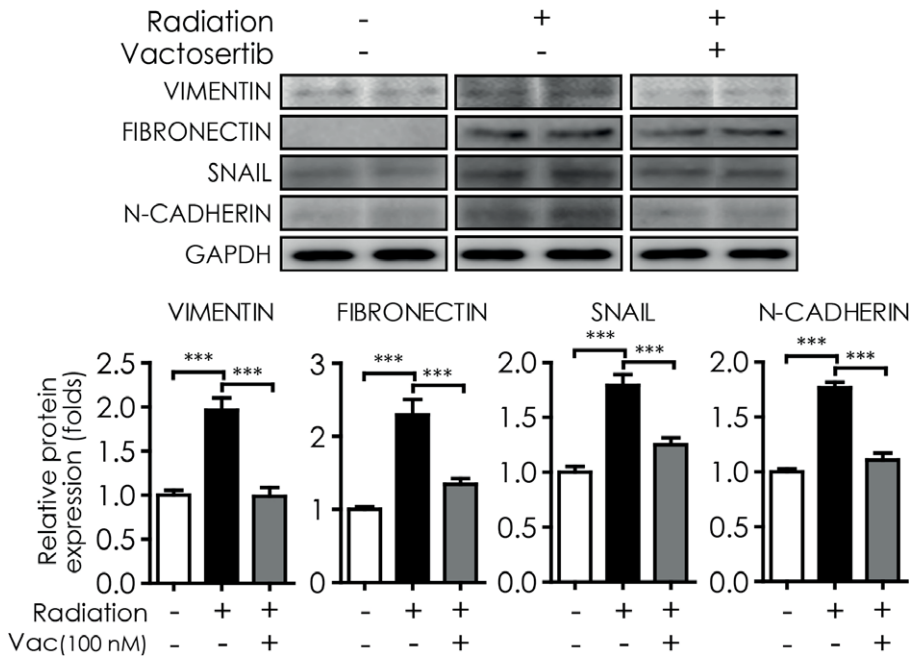

**SUPPLEMENTARY FIGURE B.** (1) Relative mRNA expression of Vimentin, Fibronectin, Snail, and N-cadherin in 4T1-Luc cells. The mRNA expression level of each marker was normalized by that of Ppia mRNA. (2) Protein expressions of VIMENTIN, FIBRONECTIN, SNAIL, and N-CADHERIN in MDA-MB-231 cells were examined by western blot analysis. Protein expression was normalized by that of GAPDH.1.

### ① Primary tumors of 4T1-Luc allografted mice

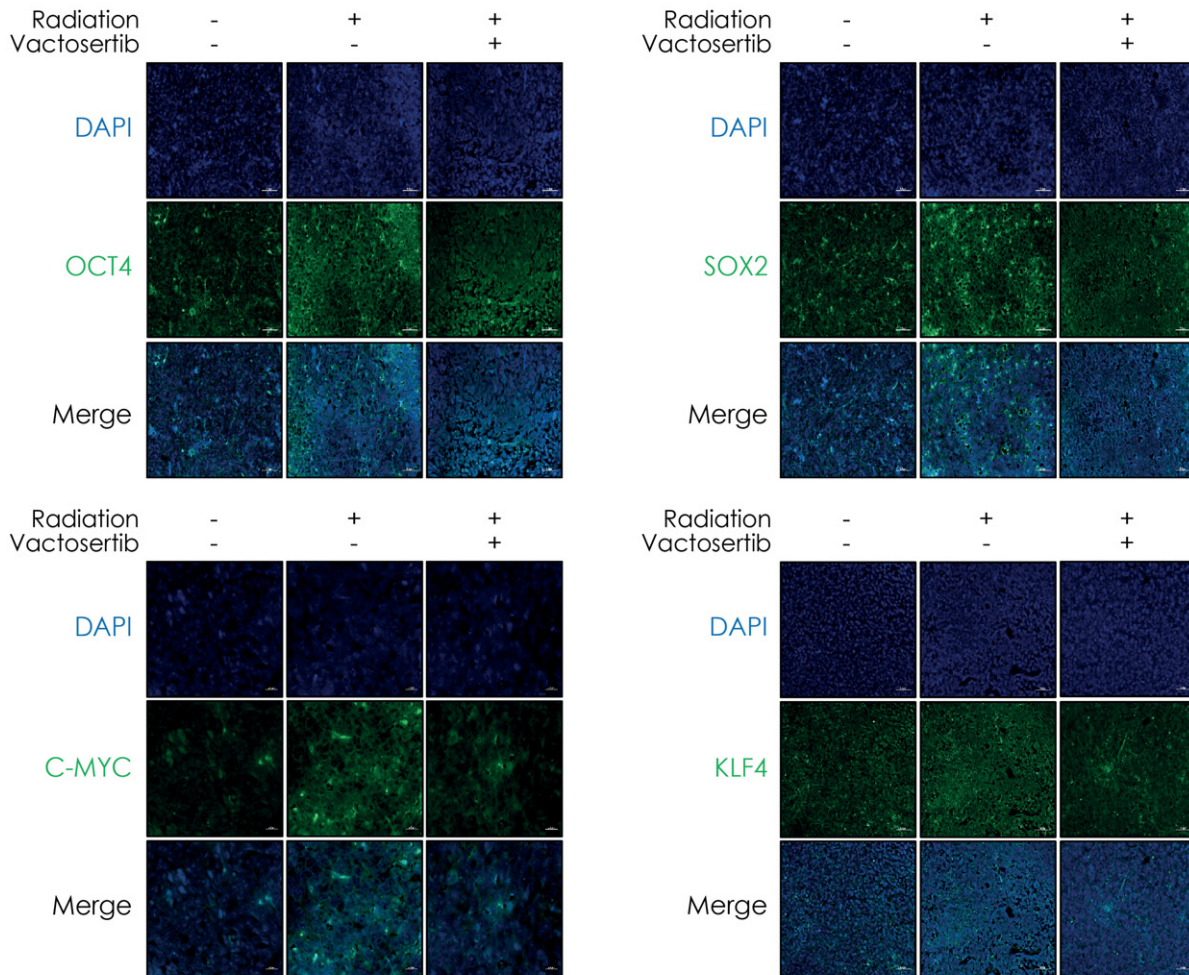

### ② MDA-MB-231

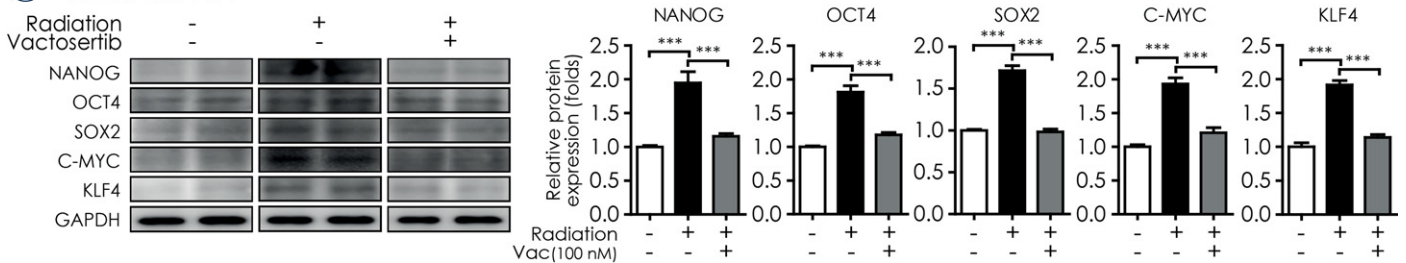

**SUPPLEMENTARY FIGURE C. (1)** Fluorescence immunohistochemistry analysis of OCT4, SOX2, C-MYC and KLF4 in irradiated primary tumors of 4T1-Luc allografted BALB/c syngeneic mice. In confocal images, green fluorescence indicates OCT4, SOX2, C-MYC, and KLF4 (magnification: 20 $\times$ , scale bar: 50  $\mu$ m). Representative images are shown from three independent experiments. **(2)** Protein expression of pluripotent stem cell regulators (NANOG, OCT4, SOX2, C-MYC and KLF4) in MDA-MB-231 cells was determined by western blot analysis. Protein expression was normalized by that of GAPDH. Data represent means of three independent experiments performed in triplicate. Significance evaluation was performed by one-way analysis of variance (ANOVA) with Bonferroni post-hoc test (\*, \*\*, and \*\*\* indicate  $p < 0.05$ ,  $p < 0.01$ , and  $p < 0.005$ , respectively).
